# Supplementary material for: High expression level of MMP9 is associated with poor prognosis in patients with clear cell renal carcinoma
Source: PeerJ. 2018 Jul 4;6:e5050. doi: 10.7717/peerj.5050 (PMC6035719; doi:10.7717/peerj.5050)
Supplement: Supplemental Information 2 [file peerj-06-5050-s002.xlsx]

## Sheet: Sheet1
Normal			CCRCC
Sample	MMP9 expression		Sample	MMP9 expression
TCGA-A3-3387-11	1.73942		TCGA-A3-A6NI-01	5.22566
TCGA-CW-5585-11	0.623349		TCGA-BP-4353-01	11.5958
TCGA-CZ-5986-11	0.167931		TCGA-A3-3380-01	11.052
TCGA-B0-5696-11	1.20652		TCGA-B0-5706-01	18.6893
TCGA-B0-5711-11	0.215327		TCGA-B0-4699-01	6.16591
TCGA-CJ-5679-11	1.14136		TCGA-AK-3460-01	1.26531
TCGA-CZ-4865-11	0.210323		TCGA-CJ-6032-01	1.24275
TCGA-A3-3358-11	0.639878		TCGA-B0-5113-01	4.54711
TCGA-CZ-5982-11	0.210391		TCGA-B0-4833-01	7.25527
TCGA-CZ-5463-11	0.268376		TCGA-AK-3427-01	0.125605
TCGA-CJ-5678-11	0.263788		TCGA-BP-4961-01	1.32295
TCGA-CW-5581-11	0.420696		TCGA-G6-A8L6-01	0.908904
TCGA-B8-5549-11	0.385489		TCGA-B4-5838-01	11.5923
TCGA-CJ-5680-11	3.06458		TCGA-B0-4823-01	3.35403
TCGA-CZ-5453-11	0.137077		TCGA-BP-4801-01	3.36865
TCGA-B0-5697-11	0.0804623		TCGA-CJ-4869-01	2.67672
TCGA-B2-5641-11	0.0679315		TCGA-B0-5116-01	1.69414
TCGA-CW-5584-11	5.45749		TCGA-BP-4759-01	1.57831
TCGA-CZ-4864-11	0.326768		TCGA-CZ-4861-01	14.3843
TCGA-B8-4620-11	2.57984		TCGA-B0-5110-01	3.7229
TCGA-CZ-5989-11	4.69262		TCGA-CJ-5682-01	1.24272
TCGA-B0-5709-11	0.765767		TCGA-CJ-6027-01	3.82064
TCGA-CJ-5676-11	1.03254		TCGA-CJ-4881-01	8.86558
TCGA-B2-5636-11	2.20449		TCGA-BP-5184-01	1.46737
TCGA-CZ-5468-11	0.140258		TCGA-A3-3325-01	1.87754
TCGA-CZ-5465-11	0.248355		TCGA-B2-5636-01	1.28507
TCGA-B0-5712-11	1.47284		TCGA-MM-A564-01	3.95775
TCGA-CJ-5689-11	1.07419		TCGA-CZ-5465-01	1.80959
TCGA-CZ-4863-11	0.211404		TCGA-B8-5164-01	1.34707
TCGA-CW-5589-11	0.4221		TCGA-B0-4822-01	5.91755
TCGA-CZ-5456-11	0.389166		TCGA-B0-5709-01	9.26934
TCGA-B0-5701-11	1.17104		TCGA-CZ-5466-01	14.4095
TCGA-CZ-5470-11	0.457899		TCGA-B8-A7U6-01	23.7822
TCGA-CZ-5458-11	0.0559265		TCGA-CJ-4889-01	6.33246
TCGA-B0-5705-11	1.01484		TCGA-BP-4756-01	8.32892
TCGA-B0-5690-11	0.0943782		TCGA-CJ-6033-01	34.7947
TCGA-CZ-5469-11	0.151517		TCGA-B4-5377-01	2.33854
TCGA-CZ-5987-11	1.00712		TCGA-BP-5180-01	0.849182
TCGA-CZ-5984-11	0.764175		TCGA-BP-4768-01	3.36193
TCGA-B8-5552-11	2.10996		TCGA-BP-5008-01	7.25277
TCGA-B0-5699-11	0.116388		TCGA-CZ-4854-01	36.6687
TCGA-CZ-5988-11	0.129111		TCGA-B4-5836-01	8.20187
TCGA-B8-4619-11	1.73462		TCGA-B0-5707-01	9.1515
TCGA-CZ-5454-11	0.0479543		TCGA-B8-A54F-01	0.614176
TCGA-B0-4712-11	0.937116		TCGA-CZ-5459-01	3.847
TCGA-CZ-5451-11	0.282202		TCGA-B8-5551-01	37.3602
TCGA-CW-6090-11	0.156306		TCGA-B8-A54E-01	0.561186
TCGA-B0-5703-11	0.566663		TCGA-A3-A6NN-01	1.37137
TCGA-CJ-5681-11	0.235403		TCGA-CZ-4860-01	9.50499
TCGA-B0-5706-11	0.221632		TCGA-B0-5104-01	1.0125
TCGA-B0-5694-11	2.43545		TCGA-AK-3426-01	25.105
TCGA-CJ-5672-11	0.146121		TCGA-B0-5077-01	25.1661
TCGA-CW-6088-11	0.0589805		TCGA-B0-4849-01	2.02538
TCGA-CZ-5452-11	0.14645		TCGA-BP-4352-01	0.862981
TCGA-CZ-5455-11	0.227868		TCGA-CJ-4639-01	1.93046
TCGA-CZ-5462-11	1.04313		TCGA-B0-5711-01	16.5319
TCGA-B0-4700-11	0.232258		TCGA-A3-3308-01	9.57463
TCGA-CJ-6033-11	0.204617		TCGA-BP-4994-01	0.985909
TCGA-CW-6087-11	0.226627		TCGA-A3-3324-01	5.28796
TCGA-B8-4622-11	1.45335		TCGA-B0-5696-01	2.35409
TCGA-CZ-5467-11	0.425027		TCGA-DV-5566-01	3.324
TCGA-CW-5587-11	0.165362		TCGA-BP-4347-01	5.23333
TCGA-CJ-6030-11	2.70904		TCGA-CJ-4878-01	1.97185
TCGA-CZ-5985-11	0.282949		TCGA-BP-4995-01	1.25581
TCGA-CJ-5677-11	1.50911		TCGA-BP-4807-01	2.00019
TCGA-CZ-5466-11	1.12127		TCGA-AK-3447-01	0.167223
TCGA-B0-5402-11	0.76514		TCGA-A3-3374-01	771.196
TCGA-CZ-5457-11	0.257034		TCGA-BP-5191-01	8.32941
TCGA-CZ-5461-11	0.116134		TCGA-B8-4619-01	1.34877
TCGA-B0-5691-11	1.78981		TCGA-B0-4810-01	2.57328
TCGA-CW-5591-11	1.42464		TCGA-B2-3923-01	0.877768
TCGA-CW-5580-11	0.567507		TCGA-CW-5591-01	0.349824
			TCGA-BP-5201-01	1.27339
			TCGA-AS-3777-01	3.22369
			TCGA-BP-4758-01	2.64572
			TCGA-B8-4620-01	32.8481
			TCGA-BP-4326-01	18.747
			TCGA-B0-4852-01	3.70063
			TCGA-B2-3923-01_r1	0
			TCGA-B2-5633-01	5.53571
			TCGA-B0-4844-01	9.78146
			TCGA-CJ-4887-01	1.29168
			TCGA-BP-4332-01	2.96474
			TCGA-BP-4967-01	6.44071
			TCGA-A3-3362-01	1.38239
			TCGA-3Z-A93Z-01	1.94185
			TCGA-A3-3357-01	1.0826
			TCGA-BP-4161-01	6.48509
			TCGA-CZ-4862-01	6.95345
			TCGA-BP-4976-01	3.88085
			TCGA-B2-3923-01_r2	0.99854
			TCGA-CJ-4882-01	19.6864
			TCGA-B0-5697-01	3.96626
			TCGA-BP-5189-01	5.48904
			TCGA-BP-4766-01	5.36378
			TCGA-CJ-4871-01	12.885
			TCGA-BP-4795-01	2.35464
			TCGA-BP-5190-01	0.782782
			TCGA-B8-4143-01	227.475
			TCGA-B0-5695-01	3.48359
			TCGA-B0-5108-01	68.7336
			TCGA-DV-5576-01	0.654379
			TCGA-B0-5109-01	6.68426
			TCGA-B8-A8YJ-01	6.64423
			TCGA-B0-5698-01	1.43705
			TCGA-BP-4162-01	2.43116
			TCGA-B0-5699-01	3.14305
			TCGA-A3-3306-01	4.52186
			TCGA-CZ-5984-01	4.01284
			TCGA-MM-A84U-01	1.20349
			TCGA-B0-4827-01	8.26796
			TCGA-BP-4765-01	0.262471
			TCGA-B0-5102-01	2.22471
			TCGA-BP-4354-01	68.5192
			TCGA-BP-4989-01	1.64717
			TCGA-AK-3434-01	6.00429
			TCGA-CJ-5680-01	3.35593
			TCGA-B0-5700-01	2.38457
			TCGA-CJ-4907-01	6.13166
			TCGA-B0-5119-01	1.13341
			TCGA-B0-4696-01	35.4601
			TCGA-A3-3370-01	2.20117
			TCGA-BP-4174-01	8.4683
			TCGA-BP-4775-01	4.49597
			TCGA-BP-4325-01	0.808713
			TCGA-BP-4771-01	7.66511
			TCGA-B2-5635-01	0.437863
			TCGA-CJ-4895-01	20.5817
			TCGA-B0-4707-01	2.48555
			TCGA-CZ-5989-01	0.149681
			TCGA-CJ-5676-01	17.1976
			TCGA-B0-5812-01	0.572563
			TCGA-BP-4346-01	2.87954
			TCGA-B0-5092-01	8.74562
			TCGA-6D-AA2E-01	0.285837
			TCGA-BP-4982-01	1.46819
			TCGA-BP-4971-01	39.8411
			TCGA-BP-4970-01	0.504371
			TCGA-B0-4710-01	11.7574
			TCGA-BP-4344-01	0.567072
			TCGA-B8-5158-01	11.3382
			TCGA-BP-4781-01	29.6345
			TCGA-A3-3319-01	0.589879
			TCGA-B0-5080-01	10.8969
			TCGA-B8-A54H-01	0.511252
			TCGA-BP-4340-01	1.34326
			TCGA-CZ-5458-01	0.379088
			TCGA-BP-4974-01	1.65412
			TCGA-B2-4101-01	3.93613
			TCGA-BP-4776-01	0.889884
			TCGA-CJ-4905-01	7.12733
			TCGA-BP-5194-01	8.19206
			TCGA-CJ-4874-01	1.34733
			TCGA-BP-5185-01	3.78511
			TCGA-CZ-5469-01	3.69825
			TCGA-B8-A54G-01	2.04175
			TCGA-B0-5402-01	3.00015
			TCGA-CZ-5988-01	14.4013
			TCGA-AK-3436-01	18.2866
			TCGA-BP-4797-01	7.27648
			TCGA-G6-A5PC-01	0.491186
			TCGA-B8-A54J-01	1.69576
			TCGA-BP-4959-01	13.8857
			TCGA-CZ-5467-01	1.98626
			TCGA-CZ-4864-01	1.88152
			TCGA-CJ-4634-01	10.8476
			TCGA-BP-4973-01	3.52751
			TCGA-BP-4975-01	3.26638
			TCGA-B0-4847-01	1.12777
			TCGA-CJ-5677-01	71.5872
			TCGA-CW-5585-01	2.94798
			TCGA-A3-3326-01	7.09844
			TCGA-CJ-4891-01	8.38558
			TCGA-CJ-5684-01	2.61286
			TCGA-BP-4763-01	1.13865
			TCGA-B8-4622-01	3.40927
			TCGA-AK-3450-01	1.01793
			TCGA-CJ-4894-01	1.63442
			TCGA-B0-4836-01	39.3153
			TCGA-A3-3322-01	1.00925
			TCGA-CZ-5982-01	1.54647
			TCGA-B8-5545-01	6.79541
			TCGA-CJ-4870-01	11.0562
			TCGA-B0-4828-01	0.426125
			TCGA-CJ-5679-01	82.7388
			TCGA-CZ-4857-01	13.2702
			TCGA-A3-3307-01	1.88578
			TCGA-AK-3465-01	1.02089
			TCGA-A3-3331-01	0.782715
			TCGA-CJ-4904-01	2.95044
			TCGA-CJ-4920-01	18.3399
			TCGA-B0-5702-01	7.34952
			TCGA-BP-4163-01	2.46429
			TCGA-B2-3924-01	3.26748
			TCGA-B2-3924-01_r1	3.17157
			TCGA-BP-4777-01	5.38814
			TCGA-CJ-4872-01	12.3204
			TCGA-B0-5712-01	2.59109
			TCGA-A3-A8CQ-01	1.27989
			TCGA-BP-4798-01	9.64957
			TCGA-CZ-5461-01	1.0642
			TCGA-BP-4337-01	11.1728
			TCGA-CJ-5683-01	1.93261
			TCGA-CJ-4899-01	1.18157
			TCGA-A3-3365-01	2.43125
			TCGA-CZ-5468-01	88.3788
			TCGA-B0-5694-01	1.09854
			TCGA-B0-5705-01	3.25282
			TCGA-BP-5192-01	0.506864
			TCGA-BP-4790-01	23.4896
			TCGA-CJ-6031-01	8.48741
			TCGA-CJ-4644-01	0.305391
			TCGA-CJ-4640-01	0.906879
			TCGA-B4-5835-01	1.46301
			TCGA-BP-4987-01	1.04103
			TCGA-B8-5549-01	1.82117
			TCGA-BP-4164-01	0.720162
			TCGA-BP-4327-01	0.862206
			TCGA-A3-3367-01	1.07044
			TCGA-AK-3454-01	7.03462
			TCGA-BP-4165-01	2.24933
			TCGA-B0-5703-01	1.9252
			TCGA-CJ-4868-01	30.5411
			TCGA-B8-4146-01	0.389956
			TCGA-BP-4983-01	66.147
			TCGA-BP-4787-01	15.3333
			TCGA-A3-3383-01	2.12262
			TCGA-B2-3924-01_r2	0.473454
			TCGA-CJ-4900-01	5.48918
			TCGA-B0-4845-01	9.3307
			TCGA-A3-3358-01	2.23818
			TCGA-CJ-4892-01	1.91554
			TCGA-DV-A4W0-01	2.09231
			TCGA-B8-4151-01	2.39187
			TCGA-B0-4693-01	2.401
			TCGA-CJ-4888-01	6.96492
			TCGA-B4-5832-01	0.154712
			TCGA-A3-3316-01	14.0318
			TCGA-B0-4700-01	117.42
			TCGA-BP-4986-01	14.7451
			TCGA-BP-5202-01	1.30886
			TCGA-BP-4158-01	1.30677
			TCGA-AK-3451-01	4.02508
			TCGA-CZ-5463-01	1.06752
			TCGA-CZ-5457-01	2.29312
			TCGA-CZ-5454-01	19.6562
			TCGA-CJ-4885-01	0.679154
			TCGA-BP-4998-01	1.54299
			TCGA-A3-3343-01	1.96414
			TCGA-AK-3453-01	1.96738
			TCGA-BP-5183-01	0.566312
			TCGA-A3-3363-01	1.97728
			TCGA-AK-3429-01	1.56404
			TCGA-CZ-5986-01	0.816487
			TCGA-B0-4824-01	2.88328
			TCGA-B4-5844-01	15.8976
			TCGA-BP-4166-01	14.4605
			TCGA-BP-4159-01	1.75836
			TCGA-CJ-4884-01	13.7553
			TCGA-BP-5175-01	13.5549
			TCGA-B0-5085-01	1.60405
			TCGA-GK-A6C7-01	2.01219
			TCGA-CZ-4863-01	1.47694
			TCGA-A3-3385-01	2.80612
			TCGA-BP-4789-01	1.20144
			TCGA-BP-4774-01	0.634998
			TCGA-B8-A54K-01	0.542762
			TCGA-B8-5550-01	39.9424
			TCGA-CJ-4916-01	1.49239
			TCGA-CZ-5451-01	5.81293
			TCGA-BP-5187-01	0.804589
			TCGA-B0-4694-01	107.829
			TCGA-DV-5569-01	1.32142
			TCGA-AK-3443-01	0.0736366
			TCGA-B2-5641-01	2.29436
			TCGA-B0-5710-01	78.7062
			TCGA-CZ-5456-01	42.8558
			TCGA-CJ-5678-01	2.42299
			TCGA-CZ-4858-01	14.7458
			TCGA-BP-4170-01	3.06731
			TCGA-AK-3440-01	0.568456
			TCGA-A3-3372-01	3.18508
			TCGA-B0-4706-01	1.38373
			TCGA-CZ-5460-01	2.58681
			TCGA-BP-4341-01	1.47154
			TCGA-BP-5004-01	93.9325
			TCGA-BP-5006-01	1.27249
			TCGA-CJ-6030-01	6.82713
			TCGA-B0-4688-01	9.852
			TCGA-B0-5095-01	19.1513
			TCGA-B0-5084-01	2.84589
			TCGA-G6-A8L7-01	2.51213
			TCGA-B0-5691-01	14.5222
			TCGA-A3-3346-01	11.8957
			TCGA-BP-4993-01	0.770378
			TCGA-BP-4977-01	1.22107
			TCGA-BP-5178-01	70.8004
			TCGA-B8-5162-01	54.7206
			TCGA-CW-6097-01	24.2141
			TCGA-B0-4814-01	2.73537
			TCGA-BP-4992-01	3.07187
			TCGA-A3-3323-01	2.17198
			TCGA-CJ-5672-01	1.72423
			TCGA-BP-5168-01	4.58465
			TCGA-BP-4964-01	6.79125
			TCGA-AS-3778-01	1.53684
			TCGA-BP-5196-01	39.7518
			TCGA-CJ-4886-01	3.63079
			TCGA-B0-5713-01	0.530178
			TCGA-MM-A563-01	14.1406
			TCGA-CW-6087-01	1.3914
			TCGA-A3-3349-01	3.22302
			TCGA-A3-3347-01	209.797
			TCGA-BP-5200-01	6.96101
			TCGA-DV-5573-01	1.53238
			TCGA-BP-4351-01	3.59346
			TCGA-CJ-4890-01	33.055
			TCGA-A3-3317-01	9.93319
			TCGA-BP-4981-01	1.46254
			TCGA-BP-4331-01	6.23267
			TCGA-BP-4343-01	16.3954
			TCGA-BP-4335-01	3.59558
			TCGA-B0-4712-01	32.0057
			TCGA-B8-5165-01	3.29857
			TCGA-B0-4703-01	21.1095
			TCGA-BP-5176-01	3.07101
			TCGA-CJ-4901-01	19.1117
			TCGA-B8-4148-01	1.47073
			TCGA-B0-4691-01	4.1373
			TCGA-CW-6090-01	52.3719
			TCGA-DV-5568-01	91.7716
			TCGA-B2-5635-01_r1	0.176246
			TCGA-EU-5904-01	2.91049
			TCGA-CJ-5689-01	16.2019
			TCGA-AK-3458-01	0.698947
			TCGA-CJ-6028-01	3.7269
			TCGA-BP-5169-01	26.9907
			TCGA-B0-4819-01	7.42552
			TCGA-A3-3359-01	2.18935
			TCGA-BP-4803-01	11.0462
			TCGA-A3-A6NL-01	4.54966
			TCGA-B0-4701-01	5.87713
			TCGA-CJ-4903-01	0.828067
			TCGA-CW-5588-01	29.0643
			TCGA-B0-4821-01	184.642
			TCGA-DV-A4VZ-01	1.15231
			TCGA-BP-5199-01	16.4432
			TCGA-BP-5186-01	0.480171
			TCGA-B0-4817-01	6.60271
			TCGA-B2-5633-01_r1	5.18703
			TCGA-CW-6088-01	1.24282
			TCGA-B0-4816-01	1.29621
			TCGA-A3-3329-01	0.900522
			TCGA-AK-3433-01	2.89678
			TCGA-BP-5010-01	28.0954
			TCGA-CZ-5455-01	3.82293
			TCGA-DV-A4VX-01	20.7545
			TCGA-CJ-4873-01	14.984
			TCGA-B0-5094-01	5.98095
			TCGA-B8-4621-01	3.62947
			TCGA-BP-4784-01	12.8835
			TCGA-CZ-5470-01	1.6233
			TCGA-CZ-5462-01	4.19784
			TCGA-B0-5107-01	0.727318
			TCGA-B4-5378-01	0.72796
			TCGA-B0-4838-01	0.836506
			TCGA-B0-4842-01	43.2369
			TCGA-CW-5590-01	17.1862
			TCGA-BP-4968-01	8.86156
			TCGA-B0-5088-01	8.70493
			TCGA-CZ-5452-01	13.2738
			TCGA-B0-5120-01	1.8677
			TCGA-AK-3455-01	1.02883
			TCGA-AK-3456-01	3.13863
			TCGA-AK-3445-01	20.9926
			TCGA-CJ-4643-01	1.41879
			TCGA-A3-3313-01	0.424227
			TCGA-A3-A8OV-01	0.289634
			TCGA-MW-A4EC-01	0.638183
			TCGA-B0-4834-01	0.269605
			TCGA-CW-6093-01	0.935297
			TCGA-BP-4761-01	7.18094
			TCGA-B0-4945-01	1.9094
			TCGA-CW-5581-01	2.90343
			TCGA-A3-3387-01	1.45509
			TCGA-B0-5081-01	32.2904
			TCGA-EU-5907-01	2.98109
			TCGA-BP-5170-01	3.91599
			TCGA-B2-4098-01	49.4197
			TCGA-AK-3431-01	25.8811
			TCGA-BP-4963-01	10.8973
			TCGA-CJ-4897-01	4.4558
			TCGA-G6-A8L8-01	2.63009
			TCGA-AK-3461-01	1.38463
			TCGA-A3-3320-01	2.60865
			TCGA-B0-5117-01	0.455115
			TCGA-B8-4153-01	0.685955
			TCGA-CJ-5681-01	5.19631
			TCGA-B0-5692-01	1.07709
			TCGA-CJ-4636-01	7.59669
			TCGA-CJ-4908-01	7.66821
			TCGA-CZ-5985-01	2.05424
			TCGA-DV-5565-01	4.06501
			TCGA-BP-4782-01	1.65402
			TCGA-B0-4841-01	2.48053
			TCGA-BP-5173-01	3.91216
			TCGA-BP-5007-01	1.49219
			TCGA-BP-4177-01	0.680384
			TCGA-BP-4991-01	5.86664
			TCGA-B0-4698-01	26.0105
			TCGA-BP-5009-01	3.30339
			TCGA-B4-5843-01	3.80798
			TCGA-BP-5001-01	0.742198
			TCGA-B0-5399-01	5.75954
			TCGA-A3-A8OU-01	1.17327
			TCGA-BP-4999-01	1.20626
			TCGA-CJ-4876-01	0.196523
			TCGA-CJ-5686-01	15.322
			TCGA-B0-4843-01	33.1962
			TCGA-B0-5083-01	3.28619
			TCGA-B0-4815-01	7.13823
			TCGA-BP-4334-01	1.11149
			TCGA-CJ-4902-01	19.8983
			TCGA-DV-5574-01	1.25011
			TCGA-B0-5121-01	2.53696
			TCGA-CZ-4856-01	0.586511
			TCGA-BP-4804-01	107.159
			TCGA-A3-3335-01	1.74371
			TCGA-BP-4972-01	7.60707
			TCGA-CJ-5675-01	1.2385
			TCGA-BP-4355-01	0.640359
			TCGA-BP-4960-01	133.087
			TCGA-A3-3378-01	14.1382
			TCGA-BP-4160-01	1.46777
			TCGA-B8-5163-01	24.6916
			TCGA-CZ-4859-01	0.999768
			TCGA-B8-4154-01	0.539702
			TCGA-A3-A8OX-01	7.22185
			TCGA-B0-4713-01	5.47892
			TCGA-B0-5098-01	2.67137
			TCGA-A3-A8OW-01	3.68763
			TCGA-A3-3382-01	0.489665
			TCGA-CZ-4866-01	0.33838
			TCGA-A3-3311-01	3.70527
			TCGA-B2-4099-01	2.22333
			TCGA-BP-4965-01	0.712547
			TCGA-BP-4342-01	6.39205
			TCGA-CW-5589-01	1.39863
			TCGA-B0-5701-01	2.15556
			TCGA-B8-5553-01	4.27909
			TCGA-A3-A6NJ-01	1.526
			TCGA-B2-A4SR-01	8.90162
			TCGA-CW-5584-01	3.03762
			TCGA-B0-4837-01	86.1302
			TCGA-B0-5096-01	29.2828
			TCGA-A3-3351-01	1.09078
			TCGA-A3-3373-01	2.61194
			TCGA-B0-4697-01	26.506
			TCGA-CZ-5987-01	1.63378
			TCGA-B8-5546-01	0.256737
			TCGA-BP-4173-01	5.6572
			TCGA-B0-5097-01	128.66
			TCGA-EU-5905-01	7.9617
			TCGA-B0-4813-01	109.23
			TCGA-BP-5177-01	13.0478
			TCGA-CJ-4642-01	12.7766
			TCGA-B8-5159-01	5.11617
			TCGA-CJ-4637-01	10.8477
			TCGA-B0-4714-01	0.658913
			TCGA-T7-A92I-01	0.0682405
			TCGA-CJ-4893-01	6.94461
			TCGA-CJ-4635-01	25.8818
			TCGA-CW-5583-01	1.03917
			TCGA-BP-5000-01	3.72847
			TCGA-A3-3328-01	1.81766
			TCGA-B0-5693-01	0.961026
			TCGA-B2-5639-01	1.82569
			TCGA-BP-4329-01	2.98439
			TCGA-A3-3352-01	5.65869
			TCGA-DV-5567-01	2.69098
			TCGA-BP-5181-01	1.97478
			TCGA-CJ-5671-01	55.55
			TCGA-CZ-5453-01	1.16397
			TCGA-B2-4102-01	0.821458
			TCGA-BP-4769-01	2.28228
			TCGA-EU-5906-01	1.93499
			TCGA-BP-5174-01	7.29681
			TCGA-CJ-4912-01	13.5292
			TCGA-CJ-4875-01	1.27717
			TCGA-B0-5115-01	7.75538
			TCGA-CW-5580-01	2.07449
			TCGA-B2-5635-01_r2	0.184991
			TCGA-BP-4962-01	2.27782
			TCGA-BP-4338-01	2.76324
			TCGA-BP-4799-01	0.517829
			TCGA-CZ-4865-01	1.91198
			TCGA-B2-5633-01_r2	1.74202
			TCGA-AK-3425-01	16.2752
			TCGA-BP-4167-01	7.364
			TCGA-B4-5834-01	0.679195
			TCGA-CZ-4853-01	3.00924
			TCGA-B0-5099-01	5.25009
			TCGA-CJ-4641-01	9.07748
			TCGA-B0-4818-01	7.8364
			TCGA-B0-4846-01	5.08288
			TCGA-B0-4848-01	11.8634
			TCGA-CW-5587-01	2.62828
			TCGA-CJ-4638-01	6.16138
			TCGA-BP-4345-01	17.2003
			TCGA-B0-5106-01	25.8552
			TCGA-BP-5195-01	33.0053
			TCGA-CJ-4918-01	12.3591
			TCGA-B0-4690-01	120.466
			TCGA-BP-4330-01	5.08805
			TCGA-B0-4811-01	4.63229
			TCGA-B0-5400-01	167.882
			TCGA-B8-A54D-01	5.56662
			TCGA-BP-4969-01	11.7025
			TCGA-BP-4985-01	9.66736
			TCGA-B0-5100-01	18.9857
			TCGA-CZ-5464-01	5.47839
			TCGA-BP-4349-01	30.5872
			TCGA-B0-5690-01	1.129
			TCGA-B0-4839-01	11.8843
			TCGA-BP-4770-01	17.6942
			TCGA-B8-A54I-01	74.1836
			TCGA-DV-5575-01	43.0578
			TCGA-B0-4718-01	59.3231
			TCGA-B0-5075-01	8.36746
			TCGA-BP-5198-01	279.47
			TCGA-A3-3376-01	2.69421
			TCGA-BP-5182-01	7.83096
			TCGA-BP-4762-01	7.46315
			TCGA-BP-4176-01	21.6792
			TCGA-BP-4169-01	128.026
			TCGA-BP-4760-01	12.9713
			TCGA-B8-5552-01	4.94661
			TCGA-AK-3428-01	121.893
