# Supplementary material for: High expression level of MMP9 is associated with poor prognosis in patients with clear cell renal carcinoma
Source: PeerJ. 2018 Jul 4;6:e5050. doi: 10.7717/peerj.5050 (PMC6035719; doi:10.7717/peerj.5050)
Supplement: Supplemental Information 3 [file peerj-06-5050-s003.xlsx]

## Sheet: ClinicalFull_matrix
Samples	Days	State	MMP9 expression	Group
TCGA-T7-A92I	356	Live	0.0682405	Low
TCGA-AK-3443	1423	Live	0.0736366	Low
TCGA-AK-3427	3583	Live	0.125605	Low
TCGA-CZ-5989	1905	Live	0.149681	Low
TCGA-B4-5832	155	Live	0.154712	Low
TCGA-AK-3447	1217	Live	0.167223	Low
TCGA-B2-5635	755	Live	0.184991	Low
TCGA-CJ-4876	1955	Live	0.196523	Low
TCGA-B8-5546	505	Live	0.256737	Low
TCGA-BP-4765	2184	Live	0.262471	Low
TCGA-B0-4834	2090	Dead	0.269605	Low
TCGA-6D-AA2E	362	Live	0.285837	Low
TCGA-A3-A8OV	340	Live	0.289634	Low
TCGA-CJ-4644	336	Dead	0.305391	Low
TCGA-CZ-4866	3267	Live	0.33838	Low
TCGA-CW-5591	2271	Live	0.349824	Low
TCGA-CZ-5458	2789	Live	0.379088	Low
TCGA-B8-4146	511	Live	0.389956	Low
TCGA-A3-3313	735	Dead	0.424227	Low
TCGA-B0-4828	307	Dead	0.426125	Low
TCGA-B0-5117	1608	Live	0.455115	Low
TCGA-B2-3924	1092	Live	0.473454	Low
TCGA-BP-5186	693	Live	0.480171	Low
TCGA-A3-3382	574	Live	0.489665	Low
TCGA-BP-4970	433	Live	0.504371	Low
TCGA-BP-5192	714	Live	0.506864	Low
TCGA-B8-A54H	256	Live	0.511252	Low
TCGA-BP-4799	1133	Dead	0.517829	Low
TCGA-B0-5713	2782	Live	0.530178	Low
TCGA-B8-4154	1380	Live	0.539702	Low
TCGA-B8-A54K	469	Live	0.542762	Low
TCGA-B8-A54E	909	Live	0.561186	Low
TCGA-BP-5183	1291	Live	0.566312	Low
TCGA-BP-4344	1666	Live	0.567072	Low
TCGA-AK-3440	2865	Live	0.568456	Low
TCGA-B0-5812	3834	Live	0.572563	Low
TCGA-CZ-4856	18	Live	0.586511	Low
TCGA-A3-3319	1130	Live	0.589879	Low
TCGA-B8-A54F	519	Live	0.614176	Low
TCGA-BP-4774	1885	Live	0.634998	Low
TCGA-MW-A4EC	498	Live	0.638183	Low
TCGA-BP-4355	953	Dead	0.640359	Low
TCGA-DV-5576	727	Dead	0.654379	Low
TCGA-B0-4714	99	Dead	0.658913	Low
TCGA-CJ-4885	3451	Live	0.679154	Low
TCGA-B4-5834	26	Live	0.679195	Low
TCGA-BP-4177	1670	Live	0.680384	Low
TCGA-B8-4153	762	Live	0.685955	Low
TCGA-AK-3458	1168	Live	0.698947	Low
TCGA-BP-4965	1871	Live	0.712547	Low
TCGA-BP-4164	992	Dead	0.720162	Low
TCGA-B0-5107	927	Dead	0.727318	Low
TCGA-B4-5378	175	Live	0.72796	Low
TCGA-BP-5001	1177	Live	0.742198	Low
TCGA-BP-4993	177	Live	0.770378	Low
TCGA-A3-3331	1485	Live	0.782715	Low
TCGA-BP-5190	1011	Live	0.782782	Low
TCGA-BP-5187	406	Live	0.804589	Low
TCGA-BP-4325	2964	Live	0.808713	Low
TCGA-CZ-5986	373	Live	0.816487	Low
TCGA-B2-4102	952	Live	0.821458	Low
TCGA-CJ-4903	1559	Live	0.828067	Low
TCGA-B0-4838	834	Dead	0.836506	Low
TCGA-BP-5180	2263	Live	0.849182	Low
TCGA-BP-4327	109	Dead	0.862206	Low
TCGA-BP-4352	344	Dead	0.862981	Low
TCGA-B2-3923	992	Live	0.877768	Low
TCGA-BP-4776	411	Live	0.889884	Low
TCGA-A3-3329	1624	Live	0.900522	Low
TCGA-CJ-4640	3480	Live	0.906879	Low
TCGA-G6-A8L6	313	Dead	0.908904	Low
TCGA-CW-6093	3146	Live	0.935297	Low
TCGA-B0-5693	4074	Live	0.961026	Low
TCGA-BP-4994	1308	Live	0.985909	Low
TCGA-CZ-4859	1787	Live	0.999768	Low
TCGA-A3-3322	1478	Live	1.00925	Low
TCGA-B0-5104	2752	Dead	1.0125	Low
TCGA-AK-3450	1779	Live	1.01793	Low
TCGA-AK-3465	369	Live	1.02089	Low
TCGA-AK-3455	683	Dead	1.02883	Low
TCGA-CW-5583	2489	Live	1.03917	Low
TCGA-BP-4987	1124	Live	1.04103	Low
TCGA-CZ-5461	330	Dead	1.0642	Low
TCGA-CZ-5463	662	Live	1.06752	Low
TCGA-A3-3367	2270	Live	1.07044	Low
TCGA-B0-5692	3944	Live	1.07709	Low
TCGA-A3-3357	2688	Live	1.0826	Low
TCGA-A3-3351	910	Live	1.09078	Low
TCGA-B0-5694	480	Dead	1.09854	Low
TCGA-BP-4334	645	Dead	1.11149	Low
TCGA-B0-4847	793	Dead	1.12777	Low
TCGA-B0-5690	3392	Live	1.129	Low
TCGA-B0-5119	1552	Live	1.13341	Low
TCGA-BP-4763	1270	Dead	1.13865	Low
TCGA-CZ-5453	25	Live	1.16397	Low
TCGA-CJ-4899	1528	Live	1.18157	Low
TCGA-BP-4789	1489	Live	1.20144	Low
TCGA-MM-A84U	700	Live	1.20349	Low
TCGA-BP-4999	1266	Live	1.20626	Low
TCGA-BP-4977	454	Live	1.22107	Low
TCGA-CJ-5675	3936	Live	1.2385	Low
TCGA-CJ-5682	3736	Live	1.24272	Low
TCGA-CJ-6032	3639	Live	1.24275	Low
TCGA-CW-6088	3222	Live	1.24282	Low
TCGA-DV-5574	2016	Live	1.25011	Low
TCGA-BP-4995	1371	Live	1.25581	Low
TCGA-AK-3460	2508	Live	1.26531	Low
TCGA-BP-5006	840	Live	1.27249	Low
TCGA-BP-5201	951	Live	1.27339	Low
TCGA-CJ-4875	2353	Live	1.27717	Low
TCGA-B2-5636	919	Live	1.28507	Low
TCGA-CJ-4887	932	Dead	1.29168	Low
TCGA-B0-4816	1371	Dead	1.29621	Low
TCGA-BP-4158	3377	Live	1.30677	Low
TCGA-BP-5202	29	Live	1.30886	Low
TCGA-DV-5569	355	Live	1.32142	Low
TCGA-BP-4961	1935	Live	1.32295	Low
TCGA-BP-4340	562	Dead	1.34326	Low
TCGA-B8-5164	26	Live	1.34707	Low
TCGA-CJ-4874	2283	Live	1.34733	Low
TCGA-B8-4619	523	Live	1.34877	Low
TCGA-A3-3362	1559	Live	1.38239	Low
TCGA-B0-4706	65	Dead	1.38373	Low
TCGA-AK-3461	2217	Live	1.38463	Low
TCGA-CW-6087	41	Dead	1.3914	Low
TCGA-CW-5589	2378	Live	1.39863	Low
TCGA-CJ-4643	1793	Live	1.41879	Low
TCGA-B0-5698	3631	Live	1.43705	Low
TCGA-A3-3387	617	Live	1.45509	Low
TCGA-BP-4981	1097	Dead	1.46254	Low
TCGA-B4-5835	16	Live	1.46301	Low
TCGA-BP-5184	1133	Live	1.46737	Low
TCGA-BP-4160	2881	Live	1.46777	Low
TCGA-BP-4982	1014	Live	1.46819	Low
TCGA-B8-4148	1520	Live	1.47073	Low
TCGA-CZ-4863	1928	Live	1.47694	Low
TCGA-BP-5007	1140	Live	1.49219	Low
TCGA-CJ-4916	1373	Live	1.49239	Low
TCGA-A3-A6NJ	468	Live	1.526	Low
TCGA-DV-5573	1130	Live	1.53238	Low
TCGA-AS-3778	43	Live	1.53684	Low
TCGA-BP-4998	932	Live	1.54299	Low
TCGA-CZ-5982	2439	Live	1.54647	Low
TCGA-AK-3429	3328	Live	1.56404	Low
TCGA-BP-4759	2372	Live	1.57831	Low
TCGA-B0-5085	770	Dead	1.60405	Low
TCGA-CZ-5470	386	Live	1.6233	Low
TCGA-CZ-5987	445	Dead	1.63378	Low
TCGA-CJ-4894	841	Dead	1.63442	Low
TCGA-BP-4989	118	Live	1.64717	Low
TCGA-BP-4782	354	Live	1.65402	Low
TCGA-BP-4974	211	Dead	1.65412	Low
TCGA-B0-5116	1274	Live	1.69414	Low
TCGA-B8-A54J	528	Live	1.69576	Low
TCGA-CJ-5672	2190	Dead	1.72423	Low
TCGA-A3-3335	1886	Live	1.74371	Low
TCGA-BP-4159	2601	Dead	1.75836	Low
TCGA-CZ-5465	1446	Live	1.80959	Low
TCGA-A3-3328	1385	Live	1.81766	Low
TCGA-B8-5549	194	Live	1.82117	Low
TCGA-B2-5639	417	Live	1.82569	Low
TCGA-B0-5120	1169	Live	1.8677	Low
TCGA-A3-3325	1170	Dead	1.87754	Low
TCGA-CZ-4864	2830	Dead	1.88152	Low
TCGA-B0-4945	2145	Dead	1.9094	Low
TCGA-CZ-4865	166	Dead	1.91198	Low
TCGA-CJ-4892	1521	Live	1.91554	Low
TCGA-B0-5703	2246	Live	1.9252	Low
TCGA-CJ-4639	3229	Live	1.93046	Low
TCGA-CJ-5683	1889	Live	1.93261	Low
TCGA-EU-5906	206	Live	1.93499	Low
TCGA-3Z-A93Z	385	Live	1.94185	Low
TCGA-A3-3343	945	Live	1.96414	Low
TCGA-AK-3453	2531	Live	1.96738	Low
TCGA-CJ-4878	2186	Live	1.97185	Low
TCGA-BP-5181	1495	Live	1.97478	Low
TCGA-A3-3363	319	Live	1.97728	Low
TCGA-CZ-5467	73	Dead	1.98626	Low
TCGA-BP-4807	211	Live	2.00019	Low
TCGA-GK-A6C7	61	Live	2.01219	Low
TCGA-B0-4849	69	Dead	2.02538	Low
TCGA-B8-A54G	53	Live	2.04175	Low
TCGA-CZ-5985	1997	Live	2.05424	Low
TCGA-CW-5580	1964	Dead	2.07449	Low
TCGA-DV-A4W0	2470	Live	2.09231	Low
TCGA-A3-3383	861	Live	2.12262	Low
TCGA-B0-5701	2461	Live	2.15556	Low
TCGA-A3-3323	1106	Live	2.17198	Low
TCGA-A3-3359	2504	Live	2.18935	Low
TCGA-A3-3370	2274	Live	2.20117	Low
TCGA-B2-4099	972	Live	2.22333	Low
TCGA-B0-5102	2764	Dead	2.22471	Low
TCGA-A3-3358	1307	Live	2.23818	Low
TCGA-BP-4165	3037	Live	2.24933	Low
TCGA-BP-4962	1785	Live	2.27782	Low
TCGA-BP-4769	1876	Live	2.28228	Low
TCGA-CZ-5457	2754	Live	2.29312	Low
TCGA-B2-5641	656	Live	2.29436	Low
TCGA-B4-5377	365	Live	2.33854	Low
TCGA-B0-5696	2609	Live	2.35409	Low
TCGA-BP-4795	620	Live	2.35464	Low
TCGA-B0-5700	1790	Live	2.38457	Low
TCGA-B8-4151	1299	Live	2.39187	Low
TCGA-B0-4693	77	Dead	2.401	Low
TCGA-CJ-5678	574	Dead	2.42299	Low
TCGA-BP-4162	3074	Live	2.43116	Low
TCGA-A3-3365	873	Live	2.43125	Low
TCGA-BP-4163	2839	Live	2.46429	Low
TCGA-B0-4841	204	Dead	2.48053	Low
TCGA-B0-4707	600	Dead	2.48555	Low
TCGA-G6-A8L7	2133	Live	2.51213	Low
TCGA-B0-5121	1485	Live	2.53696	Low
TCGA-B0-4810	478	Dead	2.57328	Low
TCGA-CZ-5460	2873	Live	2.58681	Low
TCGA-B0-5712	2722	Live	2.59109	Low
TCGA-A3-3320	1508	Live	2.60865	Low
TCGA-A3-3373	1621	Live	2.61194	Low
TCGA-CJ-5684	2231	Live	2.61286	Low
TCGA-CW-5587	2226	Live	2.62828	Low
TCGA-G6-A8L8	1091	Dead	2.63009	Low
TCGA-BP-4758	2208	Live	2.64572	Low
TCGA-B0-5098	1584	Dead	2.67137	Low
TCGA-CJ-4869	2554	Live	2.67672	Low
TCGA-DV-5567	2004	Live	2.69098	Low
TCGA-A3-3376	1696	Dead	2.69421	Low
TCGA-B0-4814	168	Dead	2.73537	Low
TCGA-BP-4338	2859	Live	2.76324	Low
TCGA-A3-3385	1993	Live	2.80612	Low
TCGA-B0-5084	222	Dead	2.84589	Low
TCGA-BP-4346	1493	Dead	2.87954	Low
TCGA-B0-4824	1657	Dead	2.88328	Low
TCGA-AK-3433	3409	Live	2.89678	Low
TCGA-CW-5581	2799	Live	2.90343	Low
TCGA-EU-5904	551	Live	2.91049	Low
TCGA-CW-5585	2609	Live	2.94798	Low
TCGA-CJ-4904	3302	Live	2.95044	Low
TCGA-BP-4332	1133	Live	2.96474	Low
TCGA-EU-5907	127	Live	2.98109	Low
TCGA-BP-4329	845	Dead	2.98439	Low
TCGA-B0-5402	1290	Live	3.00015	Low
TCGA-CZ-4853	774	Live	3.00924	Low
TCGA-CW-5584	164	Dead	3.03762	Low
TCGA-BP-4170	2343	Dead	3.06731	Low
TCGA-BP-5176	1590	Dead	3.07101	Low
TCGA-BP-4992	501	Live	3.07187	Low
TCGA-AK-3456	1143	Live	3.13863	Low
TCGA-B0-5699	3841	Live	3.14305	Low
TCGA-A3-3372	735	Live	3.18508	Low
TCGA-A3-3349	1385	Live	3.22302	Low
TCGA-AS-3777	1238	Live	3.22369	Low
TCGA-B0-5705	4537	Live	3.25282	Low
TCGA-BP-4975	1433	Live	3.26638	Low
TCGA-B0-5083	1045	Dead	3.28619	Low
TCGA-B8-5165	737	Live	3.29857	Low
TCGA-BP-5009	1092	Dead	3.30339	Low
TCGA-DV-5566	1398	Live	3.324	Low
TCGA-B0-4823	454	Dead	3.35403	Low
TCGA-CJ-5680	768	Dead	3.35593	Low
TCGA-BP-4768	400	Live	3.36193	Low
TCGA-B8-4622	1525	Live	3.40927	High
TCGA-B0-5695	2150	Live	3.48359	High
TCGA-BP-4973	1384	Live	3.52751	High
TCGA-BP-4351	970	Live	3.59346	High
TCGA-BP-4335	475	Dead	3.59558	High
TCGA-B8-4621	788	Live	3.62947	High
TCGA-CJ-4886	1952	Live	3.63079	High
TCGA-A3-A8OW	323	Live	3.68763	High
TCGA-CZ-5469	946	Dead	3.69825	High
TCGA-B0-4852	1121	Dead	3.70063	High
TCGA-A3-3311	1191	Dead	3.70527	High
TCGA-B0-5110	2009	Live	3.7229	High
TCGA-CJ-6028	1625	Dead	3.7269	High
TCGA-BP-5000	563	Live	3.72847	High
TCGA-BP-5185	1132	Live	3.78511	High
TCGA-B4-5843	11	Live	3.80798	High
TCGA-CJ-6027	1855	Live	3.82064	High
TCGA-CZ-5455	561	Dead	3.82293	High
TCGA-CZ-5459	1683	Live	3.847	High
TCGA-BP-4976	1632	Live	3.88085	High
TCGA-BP-5173	62	Dead	3.91216	High
TCGA-BP-5170	2412	Live	3.91599	High
TCGA-B2-4101	648	Live	3.93613	High
TCGA-MM-A564	607	Live	3.95775	High
TCGA-B0-5697	2630	Live	3.96626	High
TCGA-CZ-5984	2067	Live	4.01284	High
TCGA-AK-3451	2868	Live	4.02508	High
TCGA-DV-5565	1329	Live	4.06501	High
TCGA-B0-4691	139	Dead	4.1373	High
TCGA-CZ-5462	311	Dead	4.19784	High
TCGA-B8-5553	435	Live	4.27909	High
TCGA-CJ-4897	3341	Live	4.4558	High
TCGA-BP-4775	1843	Live	4.49597	High
TCGA-B0-5113	1175	Live	4.54711	High
TCGA-A3-A6NL	689	Live	4.54966	High
TCGA-BP-5168	1463	Dead	4.58465	High
TCGA-B0-4811	1417	Dead	4.63229	High
TCGA-B8-5552	1046	Live	4.94661	High
TCGA-B0-4846	1200	Dead	5.08288	High
TCGA-BP-4330	1888	Live	5.08805	High
TCGA-B8-5159	722	Live	5.11617	High
TCGA-CJ-5681	552	Dead	5.19631	High
TCGA-A3-A6NI	1018	Live	5.22566	High
TCGA-BP-4347	1367	Live	5.23333	High
TCGA-B0-5099	485	Dead	5.25009	High
TCGA-A3-3324	1186	Live	5.28796	High
TCGA-BP-4766	1462	Live	5.36378	High
TCGA-BP-4777	1731	Live	5.38814	High
TCGA-CZ-5464	2128	Live	5.47839	High
TCGA-B0-4713	202	Dead	5.47892	High
TCGA-BP-5189	822	Dead	5.48904	High
TCGA-CJ-4900	1714	Dead	5.48918	High
TCGA-B2-5633	963	Live	5.53571	High
TCGA-B8-A54D	830	Live	5.56662	High
TCGA-BP-4173	1893	Live	5.6572	High
TCGA-A3-3352	561	Dead	5.65869	High
TCGA-B0-5399	1411	Live	5.75954	High
TCGA-CZ-5451	1929	Live	5.81293	High
TCGA-BP-4991	1413	Live	5.86664	High
TCGA-B0-4701	238	Dead	5.87713	High
TCGA-B0-4822	1111	Dead	5.91755	High
TCGA-B0-5094	333	Dead	5.98095	High
TCGA-AK-3434	2087	Live	6.00429	High
TCGA-CJ-4907	1499	Live	6.13166	High
TCGA-CJ-4638	431	Dead	6.16138	High
TCGA-B0-4699	110	Dead	6.16591	High
TCGA-BP-4331	2454	Dead	6.23267	High
TCGA-CJ-4889	1946	Live	6.33246	High
TCGA-BP-4342	2256	Dead	6.39205	High
TCGA-BP-4967	205	Live	6.44071	High
TCGA-BP-4161	2746	Live	6.48509	High
TCGA-B0-4817	1019	Dead	6.60271	High
TCGA-B8-A8YJ	431	Live	6.64423	High
TCGA-B0-5109	587	Dead	6.68426	High
TCGA-BP-4964	1862	Live	6.79125	High
TCGA-B8-5545	1525	Live	6.79541	High
TCGA-CJ-6030	2299	Dead	6.82713	High
TCGA-CJ-4893	750	Live	6.94461	High
TCGA-CZ-4862	3271	Live	6.95345	High
TCGA-BP-5200	1063	Live	6.96101	High
TCGA-CJ-4888	1567	Dead	6.96492	High
TCGA-AK-3454	874	Live	7.03462	High
TCGA-A3-3326	1137	Live	7.09844	High
TCGA-CJ-4905	1496	Live	7.12733	High
TCGA-B0-4815	1588	Dead	7.13823	High
TCGA-BP-4761	182	Live	7.18094	High
TCGA-BP-5008	1071	Live	7.25277	High
TCGA-B0-4833	2386	Dead	7.25527	High
TCGA-BP-4797	1107	Live	7.27648	High
TCGA-BP-5174	2257	Live	7.29681	High
TCGA-B0-5702	2172	Live	7.34952	High
TCGA-BP-4167	2718	Live	7.364	High
TCGA-B0-4819	183	Dead	7.42552	High
TCGA-BP-4762	1343	Dead	7.46315	High
TCGA-CJ-4636	1924	Live	7.59669	High
TCGA-BP-4972	1502	Live	7.60707	High
TCGA-BP-4771	162	Dead	7.66511	High
TCGA-CJ-4908	1531	Live	7.66821	High
TCGA-B0-5115	1604	Live	7.75538	High
TCGA-BP-5182	1165	Live	7.83096	High
TCGA-B0-4818	510	Dead	7.8364	High
TCGA-EU-5905	119	Live	7.9617	High
TCGA-BP-5194	408	Live	8.19206	High
TCGA-B4-5836	141	Live	8.20187	High
TCGA-B0-4827	885	Dead	8.26796	High
TCGA-BP-4756	374	Live	8.32892	High
TCGA-BP-5191	967	Live	8.32941	High
TCGA-B0-5075	637	Dead	8.36746	High
TCGA-CJ-4891	819	Dead	8.38558	High
TCGA-BP-4174	1879	Live	8.4683	High
TCGA-CJ-6031	1906	Live	8.48741	High
TCGA-B0-5088	563	Dead	8.70493	High
TCGA-B0-5092	459	Dead	8.74562	High
TCGA-BP-4968	1746	Live	8.86156	High
TCGA-CJ-4881	2014	Live	8.86558	High
TCGA-B2-A4SR	507	Live	8.90162	High
TCGA-CJ-4641	1661	Dead	9.07748	High
TCGA-B0-5707	3744	Live	9.1515	High
TCGA-B0-5709	3974	Live	9.26934	High
TCGA-B0-4845	1986	Dead	9.3307	High
TCGA-CZ-4860	206	Dead	9.50499	High
TCGA-A3-3308	16	Live	9.57463	High
TCGA-BP-4798	334	Dead	9.64957	High
TCGA-BP-4985	952	Dead	9.66736	High
TCGA-B0-4844	313	Dead	9.78146	High
TCGA-B0-4688	101	Dead	9.852	High
TCGA-A3-3317	1491	Live	9.93319	High
TCGA-CJ-4634	3498	Live	10.8476	High
TCGA-CJ-4637	2227	Dead	10.8477	High
TCGA-B0-5080	342	Dead	10.8969	High
TCGA-BP-4963	1834	Live	10.8973	High
TCGA-BP-4803	204	Live	11.0462	High
TCGA-A3-3380	567	Live	11.052	High
TCGA-CJ-4870	1498	Live	11.0562	High
TCGA-BP-4337	2	Dead	11.1728	High
TCGA-B8-5158	1218	Live	11.3382	High
TCGA-B4-5838	166	Live	11.5923	High
TCGA-BP-4353	375	Dead	11.5958	High
TCGA-BP-4969	1794	Live	11.7025	High
TCGA-B0-4710	1755	Live	11.7574	High
TCGA-B0-4848	883	Dead	11.8634	High
TCGA-B0-4839	1639	Dead	11.8843	High
TCGA-A3-3346	137	Dead	11.8957	High
TCGA-CJ-4872	326	Live	12.3204	High
TCGA-CJ-4918	93	Dead	12.3591	High
TCGA-CJ-4642	3205	Live	12.7766	High
TCGA-BP-4784	1854	Live	12.8835	High
TCGA-CJ-4871	2423	Live	12.885	High
TCGA-BP-4760	2361	Live	12.9713	High
TCGA-BP-5177	293	Live	13.0478	High
TCGA-CZ-4857	1432	Dead	13.2702	High
TCGA-CZ-5452	1789	Live	13.2738	High
TCGA-CJ-4912	1657	Live	13.5292	High
TCGA-BP-5175	932	Live	13.5549	High
TCGA-CJ-4884	1759	Live	13.7553	High
TCGA-BP-4959	2660	Live	13.8857	High
TCGA-A3-3316	1493	Live	14.0318	High
TCGA-A3-3378	630	Live	14.1382	High
TCGA-MM-A563	591	Live	14.1406	High
TCGA-CZ-4861	446	Dead	14.3843	High
TCGA-CZ-5988	693	Live	14.4013	High
TCGA-CZ-5466	685	Live	14.4095	High
TCGA-BP-4166	13	Live	14.4605	High
TCGA-B0-5691	3431	Live	14.5222	High
TCGA-BP-4986	785	Live	14.7451	High
TCGA-CZ-4858	1943	Live	14.7458	High
TCGA-CJ-4873	2259	Live	14.984	High
TCGA-CJ-5686	2038	Live	15.322	High
TCGA-BP-4787	480	Dead	15.3333	High
TCGA-B4-5844	7	Live	15.8976	High
TCGA-CJ-5689	1620	Dead	16.2019	High
TCGA-AK-3425	3343	Live	16.2752	High
TCGA-BP-4343	1912	Dead	16.3954	High
TCGA-BP-5199	1355	Live	16.4432	High
TCGA-B0-5711	3989	Live	16.5319	High
TCGA-CW-5590	1075	Dead	17.1862	High
TCGA-CJ-5676	4067	Live	17.1976	High
TCGA-BP-4345	1516	Live	17.2003	High
TCGA-BP-4770	329	Dead	17.6942	High
TCGA-AK-3436	3331	Live	18.2866	High
TCGA-CJ-4920	139	Dead	18.3399	High
TCGA-B0-5706	3205	Live	18.6893	High
TCGA-BP-4326	1625	Dead	18.747	High
TCGA-B0-5100	1913	Dead	18.9857	High
TCGA-CJ-4901	1450	Live	19.1117	High
TCGA-B0-5095	245	Dead	19.1513	High
TCGA-CZ-5454	722	Dead	19.6562	High
TCGA-CJ-4882	1883	Live	19.6864	High
TCGA-CJ-4902	1520	Live	19.8983	High
TCGA-CJ-4895	1200	Dead	20.5817	High
TCGA-DV-A4VX	1626	Dead	20.7545	High
TCGA-AK-3445	2392	Live	20.9926	High
TCGA-B0-4703	182	Dead	21.1095	High
TCGA-BP-4176	1955	Live	21.6792	High
TCGA-BP-4790	1111	Dead	23.4896	High
TCGA-B8-A7U6	495	Live	23.7822	High
TCGA-CW-6097	571	Dead	24.2141	High
TCGA-B8-5163	822	Live	24.6916	High
TCGA-AK-3426	885	Dead	25.105	High
TCGA-B0-5077	1317	Dead	25.1661	High
TCGA-B0-5106	1598	Dead	25.8552	High
TCGA-AK-3431	1853	Live	25.8811	High
TCGA-CJ-4635	1416	Live	25.8818	High
TCGA-B0-4698	42	Dead	26.0105	High
TCGA-B0-4697	578	Dead	26.506	High
TCGA-BP-5169	193	Live	26.9907	High
TCGA-BP-5010	878	Dead	28.0954	High
TCGA-CW-5588	2017	Live	29.0643	High
TCGA-B0-5096	68	Dead	29.2828	High
TCGA-BP-4781	2080	Live	29.6345	High
TCGA-CJ-4868	646	Dead	30.5411	High
TCGA-BP-4349	372	Live	30.5872	High
TCGA-B0-4712	1337	Dead	32.0057	High
TCGA-B0-5081	362	Dead	32.2904	High
TCGA-B8-4620	777	Live	32.8481	High
TCGA-BP-5195	749	Live	33.0053	High
TCGA-CJ-4890	3519	Live	33.055	High
TCGA-B0-4843	320	Dead	33.1962	High
TCGA-CJ-6033	224	Dead	34.7947	High
TCGA-B0-4696	866	Dead	35.4601	High
TCGA-CZ-4854	1404	Dead	36.6687	High
TCGA-B8-5551	16	Live	37.3602	High
TCGA-B0-4836	1238	Dead	39.3153	High
TCGA-BP-5196	1018	Live	39.7518	High
TCGA-BP-4971	1487	Live	39.8411	High
TCGA-B8-5550	1476	Live	39.9424	High
TCGA-CZ-5456	2422	Live	42.8558	High
TCGA-DV-5575	1729	Live	43.0578	High
TCGA-B0-4842	1724	Dead	43.2369	High
TCGA-B2-4098	51	Dead	49.4197	High
TCGA-CW-6090	2552	Live	52.3719	High
TCGA-B8-5162	36	Live	54.7206	High
TCGA-CJ-5671	3987	Live	55.55	High
TCGA-B0-4718	1778	Live	59.3231	High
TCGA-BP-4983	1413	Live	66.147	High
TCGA-BP-4354	1034	Dead	68.5192	High
TCGA-B0-5108	1782	Live	68.7336	High
TCGA-BP-5178	1912	Dead	70.8004	High
TCGA-CJ-5677	782	Dead	71.5872	High
TCGA-B8-A54I	150	Live	74.1836	High
TCGA-B0-5710	2430	Live	78.7062	High
TCGA-CJ-5679	679	Dead	82.7388	High
TCGA-B0-4837	1378	Dead	86.1302	High
TCGA-CZ-5468	59	Dead	88.3788	High
TCGA-DV-5568	370	Live	91.7716	High
TCGA-BP-5004	1126	Live	93.9325	High
TCGA-BP-4804	1459	Live	107.159	High
TCGA-B0-4694	106	Dead	107.829	High
TCGA-B0-4813	18	Dead	109.23	High
TCGA-B0-4700	1980	Dead	117.42	High
TCGA-B0-4690	43	Dead	120.466	High
TCGA-AK-3428	3728	Live	121.893	High
TCGA-BP-4169	701	Dead	128.026	High
TCGA-B0-5097	665	Live	128.66	High
TCGA-BP-4960	2172	Live	133.087	High
TCGA-B0-5400	1733	Live	167.882	High
TCGA-B0-4821	1230	Dead	184.642	High
TCGA-A3-3347	1610	Dead	209.797	High
TCGA-B8-4143	709	Dead	227.475	High
TCGA-BP-5198	603	Live	279.47	High
TCGA-A3-3374	1314	Live	771.196	High
